# Supplementary material for: SnS2–SnS pn hetero-junction bonded on graphene with boosted charge transfer for lithium storage
Source: Royal Society of Chemistry journal article supplement (doi:10.1039/d1nr05438d), 2021-01-01
Supplement: d1nr05438d1.pdf [file d1nr05438d1.pdf]

## SnS<sub>2</sub>-SnS *pn* hetero-junction bonded on graphene with boosted charge transfer for lithium storage

Jie Wang,<sup>ab</sup> Zijia Zhang<sup>a</sup> and Hailei Zhao<sup>\*ab</sup>

<sup>a</sup> School of Materials Science and Engineering, University of Science and Technology  
Beijing, Beijing 100083, China.

<sup>b</sup> Beijing Municipal Key Laboratory of New Energy Materials and Technologies,  
Beijing 100083, China

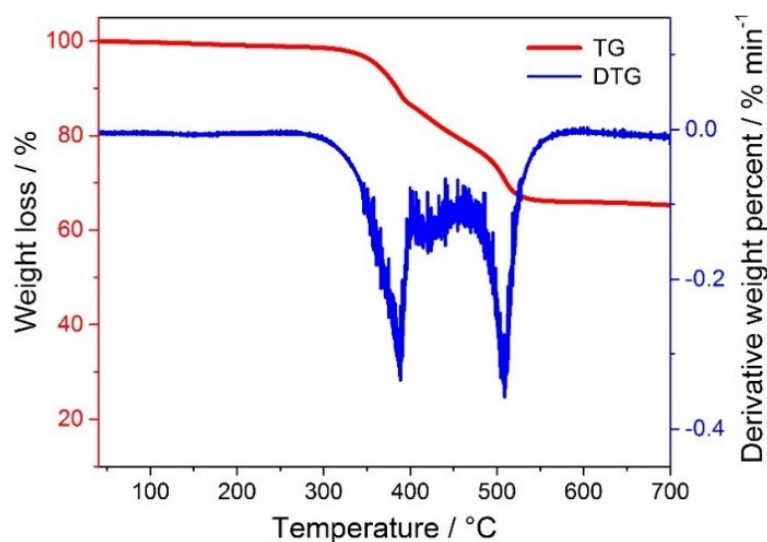

Fig. S1 TG and DTG curves of SnS<sub>2</sub>-SnS/rGO composite.

In the DTG curve, there are two prominent peaks located at ~390 °C and ~510 °C, which are attributed to the oxidation of SnS<sub>2</sub> to SnO<sub>2</sub> and the combustion of graphene.<sup>1</sup>

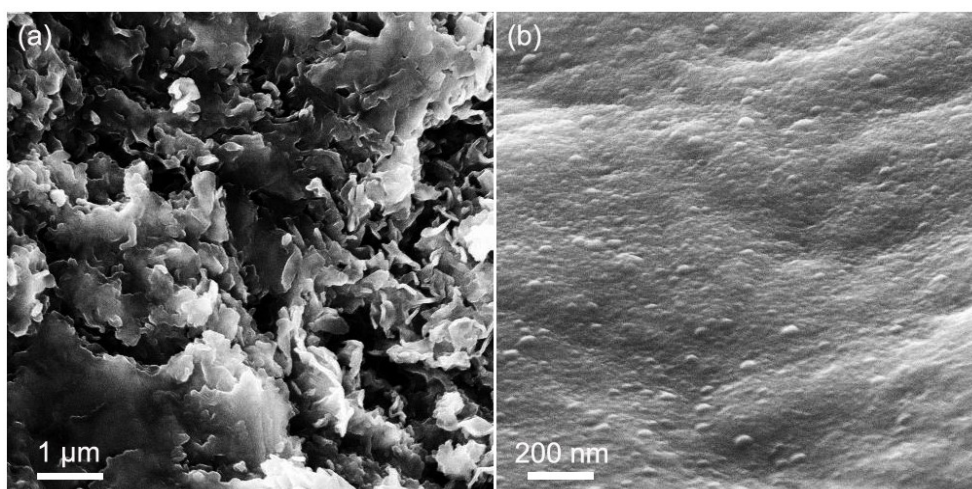

Fig. S2 FESEM images of SnS<sub>2</sub>-SnS/rGO sample.

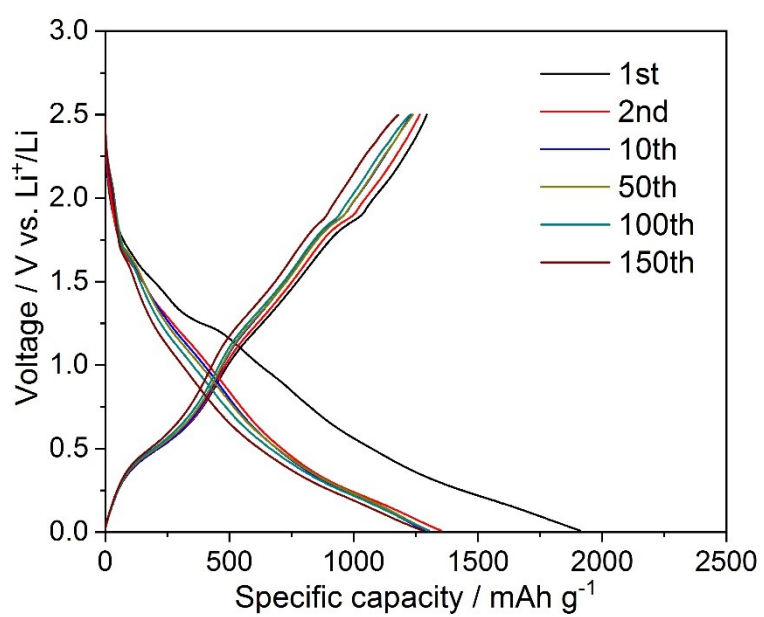

Fig. S3 Charge-discharge voltage profiles of SnS<sub>2</sub>-SnS/rGO electrode at 0.1 A g<sup>-1</sup> for lithium storages.

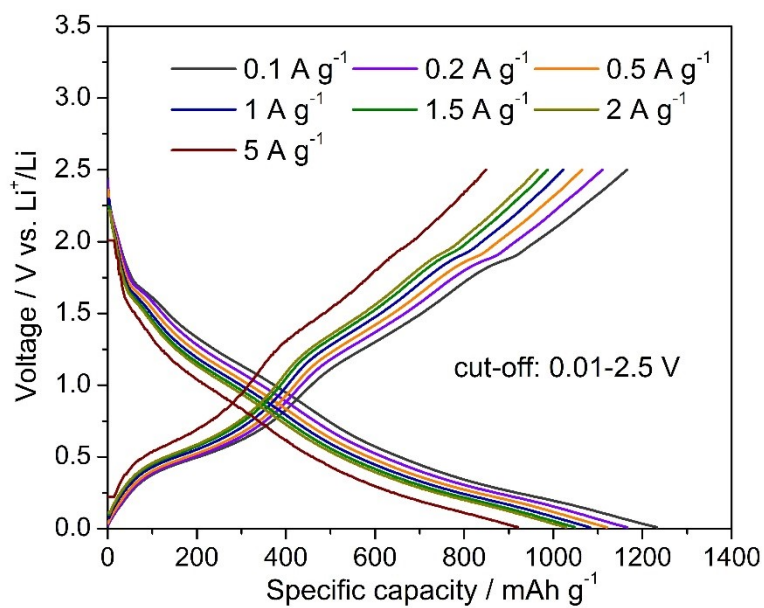

Fig. S4 Charge/discharge curves of SnS<sub>2</sub>-SnS/rGO electrode.

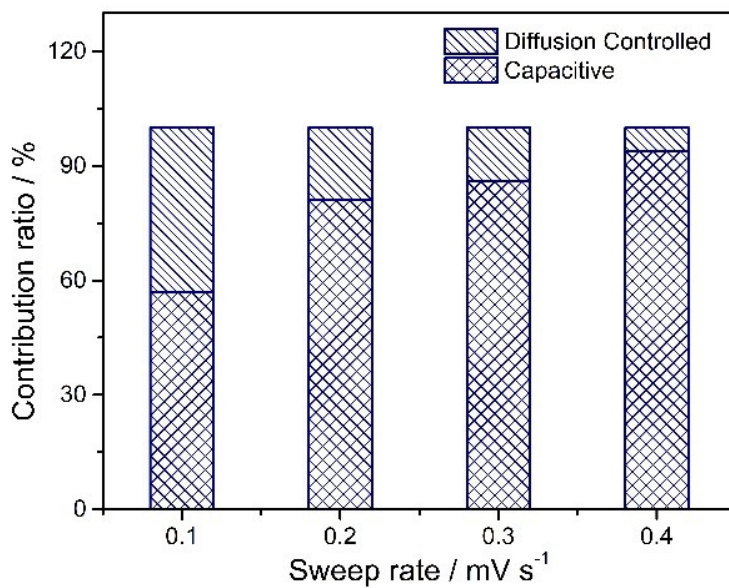

Fig. S5 Contribution ratio of the diffusion-controlled and capacitive capacities of SnS<sub>2</sub>-SnS/rGO sample at different scan rates.

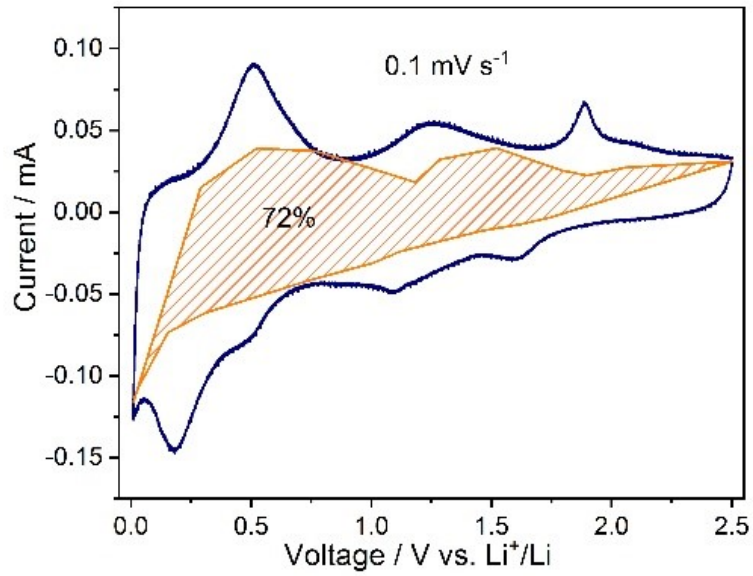

Fig. S6 CV curves of SnS<sub>2</sub>/rGO with separation between total current (blue line) and surface capacitive current (orange line) at a scan rate of 0.1 mV s<sup>-1</sup>.<sup>2</sup>

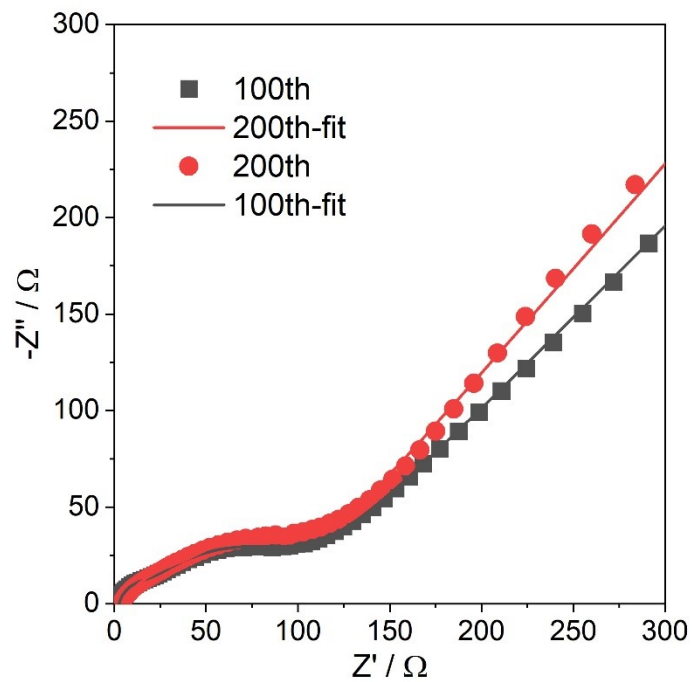

Fig. S7 Nyquist plots of SnS<sub>2</sub>-SnS/rGO electrode in the range of 0.1 Hz to 10<sup>6</sup> Hz.

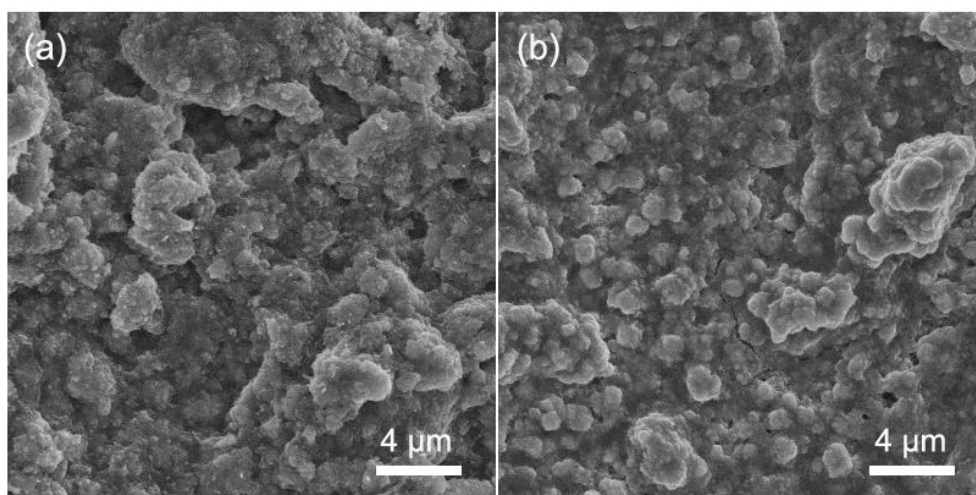

Fig. S8. FESEM images of SnS<sub>2</sub>-SnS/rGO electrode (a) before and (b) after cycling for 100 cycles at a current density of 1 A g<sup>-1</sup>.

## References

1. J. Huang, K. Yu, C. Gu, M. Zhai, Y. Wu, M. Yang and J. Liu, *Sens. Actuators B*, 2010, **147**, 467-474.
2. Z. Zhang, H. Zhao, J. Fang, X. Chang, Z. Li and L. Zhao, *ACS Appl. Mater. Interfaces*, 2018, **10**, 28533-28540.
